# Supplementary material for: Delineation of the Direct Contribution of Candida auris ERG11 Mutations to Clinical Triazole Resistance
Source: PubMed Central journal article supplement (PMC8653815; doi:10.1128/spectrum.01585-21), 2021-12-08
Supplement: spectrum01585-21_supp_1_seq9.pdf [file spectrum01585-21_supp_1_seq9.pdf]

## SUPPLEMENTARY TABLES

**Table S1. Primers used in these studies.**

| Primer Name        | Sequence <sup>1</sup>                                                                              | Description                              |
|--------------------|----------------------------------------------------------------------------------------------------|------------------------------------------|
| CAU_ERG11_ORF-F    | TCACCGCGGGAGTCGTCGCGTAAATACAATGCC                                                                  | ORF amplification with <i>SacII</i> site |
| CAU_ERG11_ORF-R    | TCACGGCCGGAACTAGTCCTCTTCCAAGCGG                                                                    | ORF amplification with <i>EagI</i> site  |
| CAU_ERG11_RT_F     | CGACTTGAGTTCAACATTTTCACTCGC                                                                        | Repair template amplification            |
| CAU_ERG11_RT_R     | CAAGCAATAGTCAAGCATTCTTTCCTTTGAGAGTT<br>GAAGCTGTCCAATTTCTGTTGCCAACATCACTCCG<br>GGTTTTCCCAGTCACGACGT | Repair template amplification            |
| CAU_ERG11_5'_crRNA | AAAAGAACCTTTGACAGCTA                                                                               | 5' RNP target sequence                   |
| CAU_ERG11_3'_crRNA | TATTGTGCACTCTACGCATA                                                                               | 3' RNP target sequence                   |
| CAU0130K02m        | CCATCGTATAGTGGTCTCC                                                                                | forward sequencing primer 1              |
| CAU0131K02m        | CGTTGGCCACGCCGTTG                                                                                  | reverse sequencing primer 3              |
| CAU0132K02m        | GGGACTTGATCGACTCGC                                                                                 | forward sequencing primer 2              |
| CAU0133K02m        | GGCATGTGCAAACGCAACG                                                                                | reverse sequencing primer 2              |
| CAU0134K02m        | GGCGGTGGTAGACACCG                                                                                  | forward sequencing primer 3              |
| CAU0135K02m        | CTGGCCTGAGTCACCAC                                                                                  | reverse sequencing primer 1              |

1. Sequences are listed in 5' to 3' orientation, and restriction enzyme recognition sites are denoted by underlined nucleotides

**Table S2. Isolates and strains used in these studies.**

| Isolate/ Strain Name      | <i>ERG11</i> sequence |
|---------------------------|-----------------------|
| AR0387                    | WT                    |
| AR0387_ERG11-WT-2-34      | WT                    |
| AR0387_ERG11-VF125AL-8-11 | VF125AL               |
| AR0387_ERG11-Y132F-5-13   | Y132F                 |
| AR0387_ERG11-K143R-3-10   | K143R                 |
| AR0390                    | K143R                 |
| AR0390_ERG11-K143R-2-6    | K143R                 |
| AR0390_ERG11-WT-7-15      | WT                    |
